# Supplementary material for: A comprehensive data mining study shows that most nuclear receptors act as newly proposed homeostasis-associated molecular pattern receptors
Source: Springer Nature journal article supplement (doi:10.1186/s13045-017-0526-8), 2017-10-24
Supplement: MOESM2 [file 15159938]

Supplementary figure 2. 48 nuclear receptors are associated with SAH and SAM/SAH ratio in mouse tissues.  
 A. 48 nuclear receptors are associated with SAH in mouse tissues.

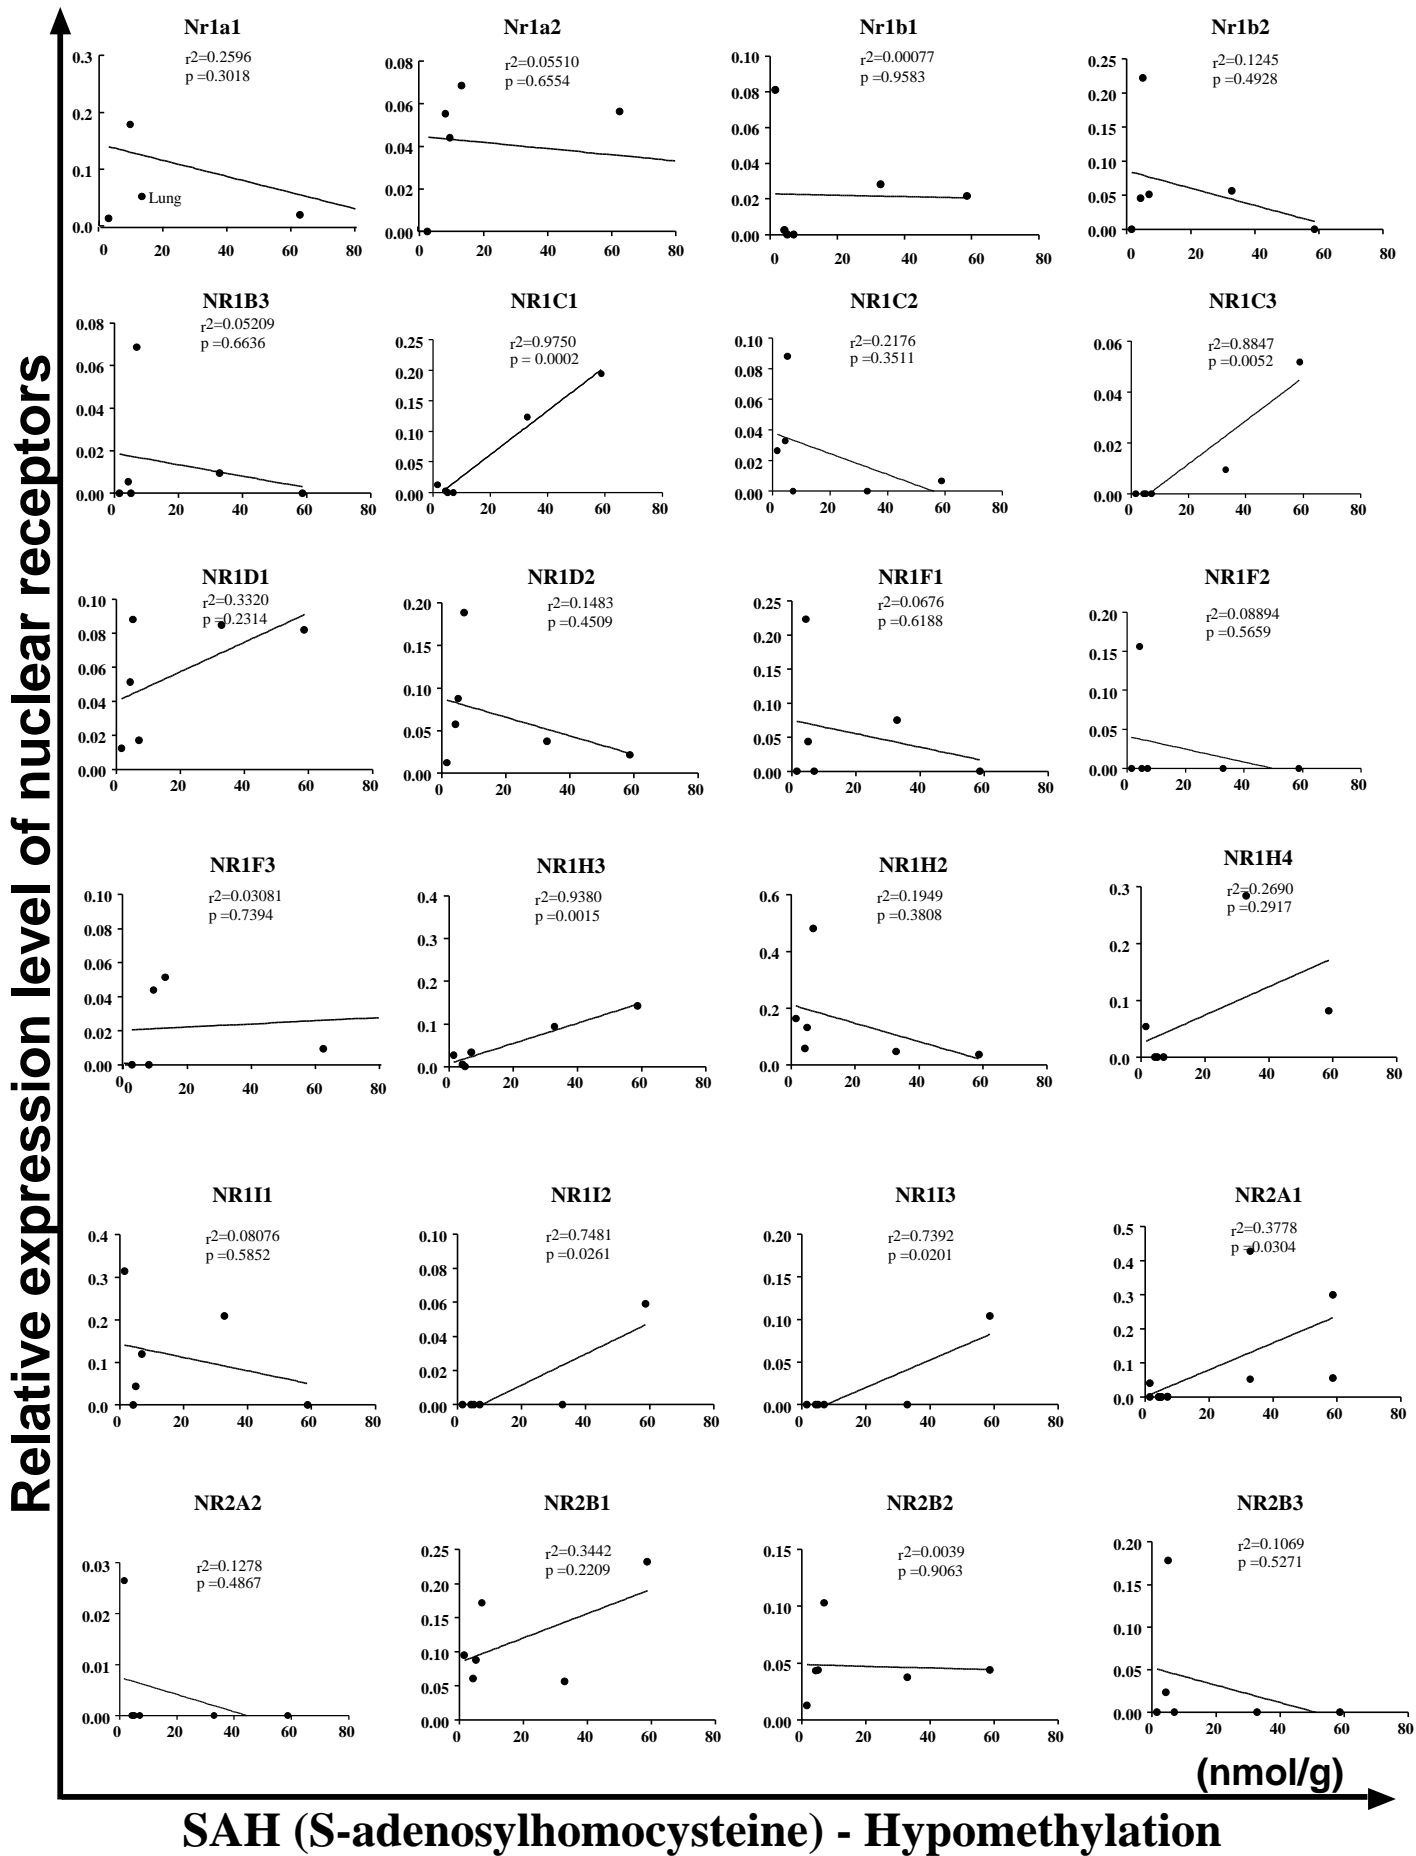

Relative expression level of nuclear receptors

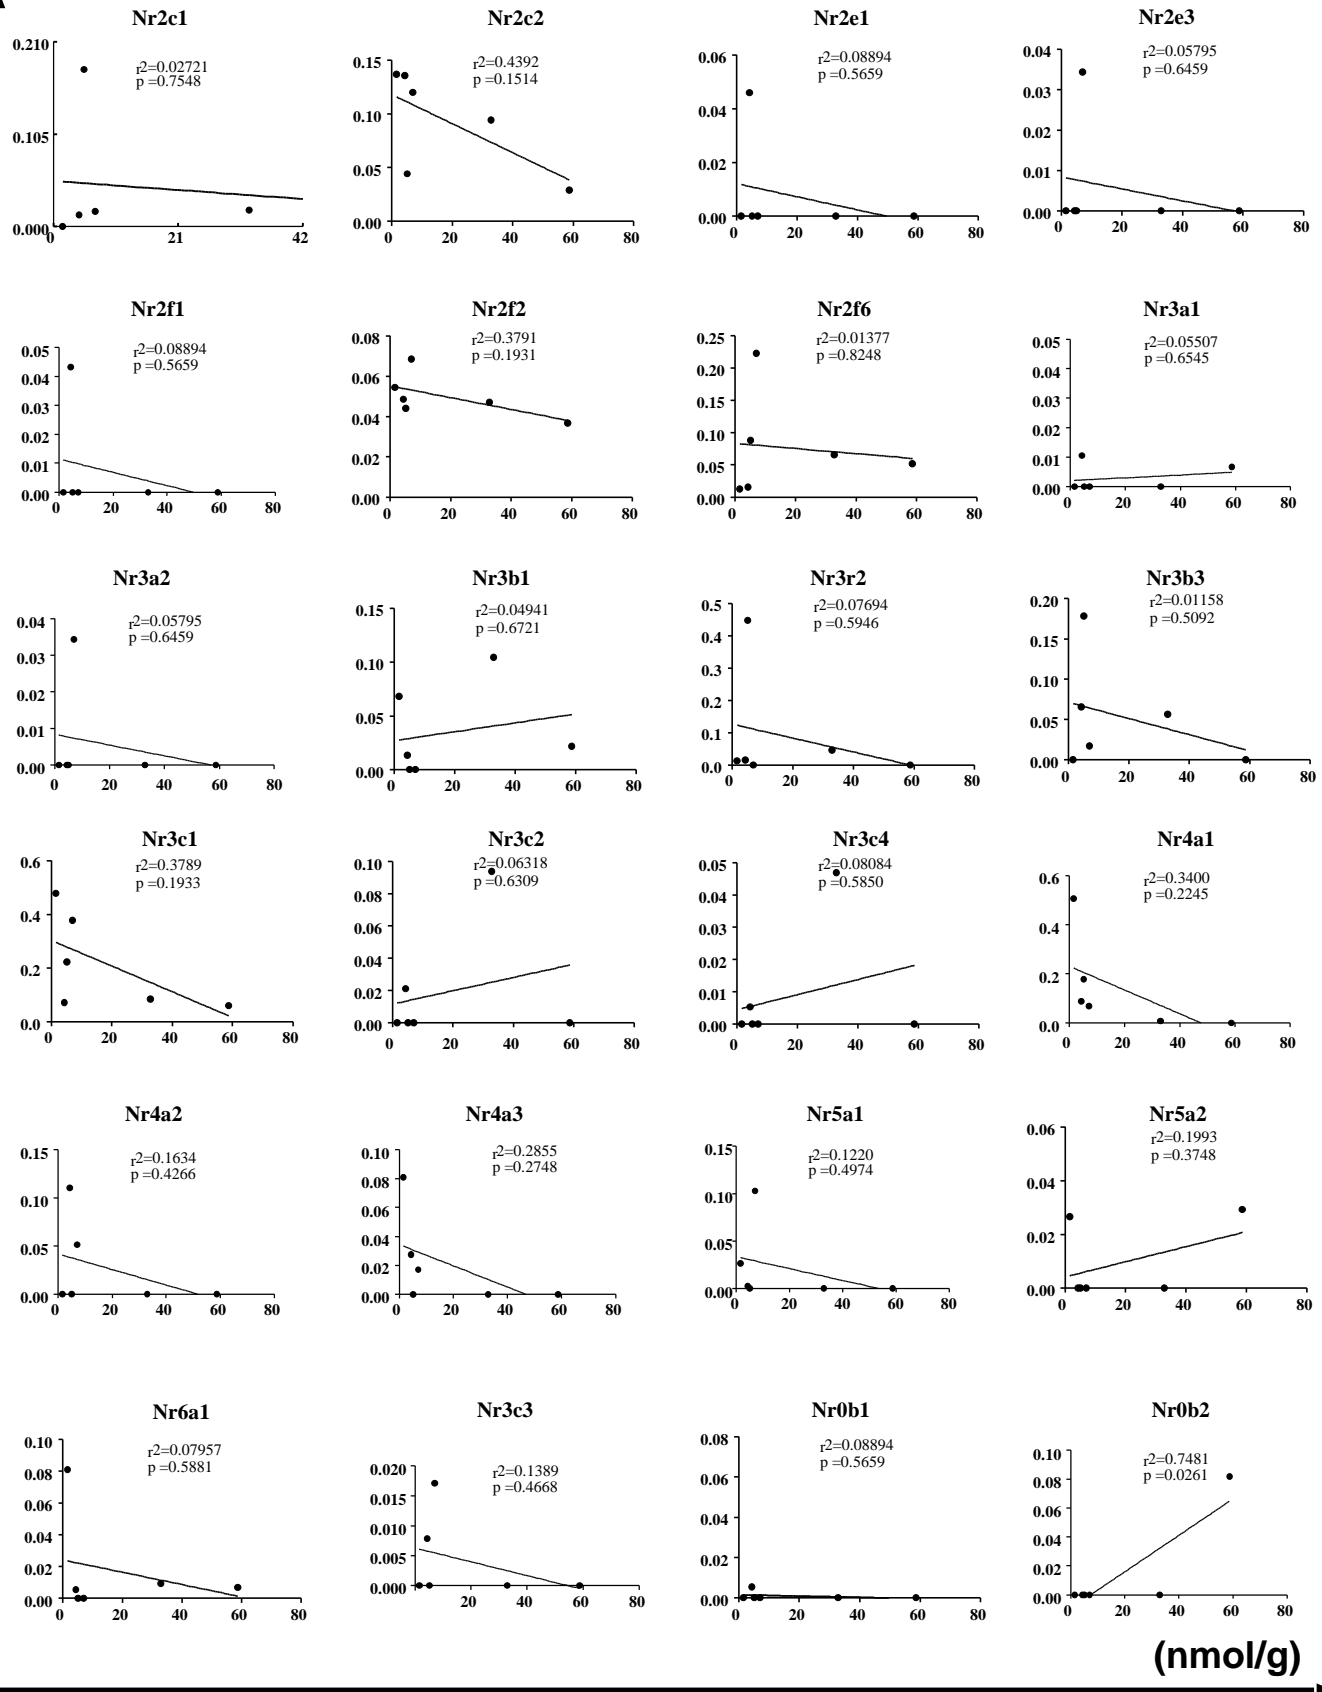

SAH (S-adenosylhomocysteine) - Hypomethylation

Supplementary figure 2. 48 nuclear receptors are associated with SAH and SAM/SAH ratio in mouse tissues.  
 B. 48 nuclear receptors are associated with SAM/SAH ratio in mouse tissues.

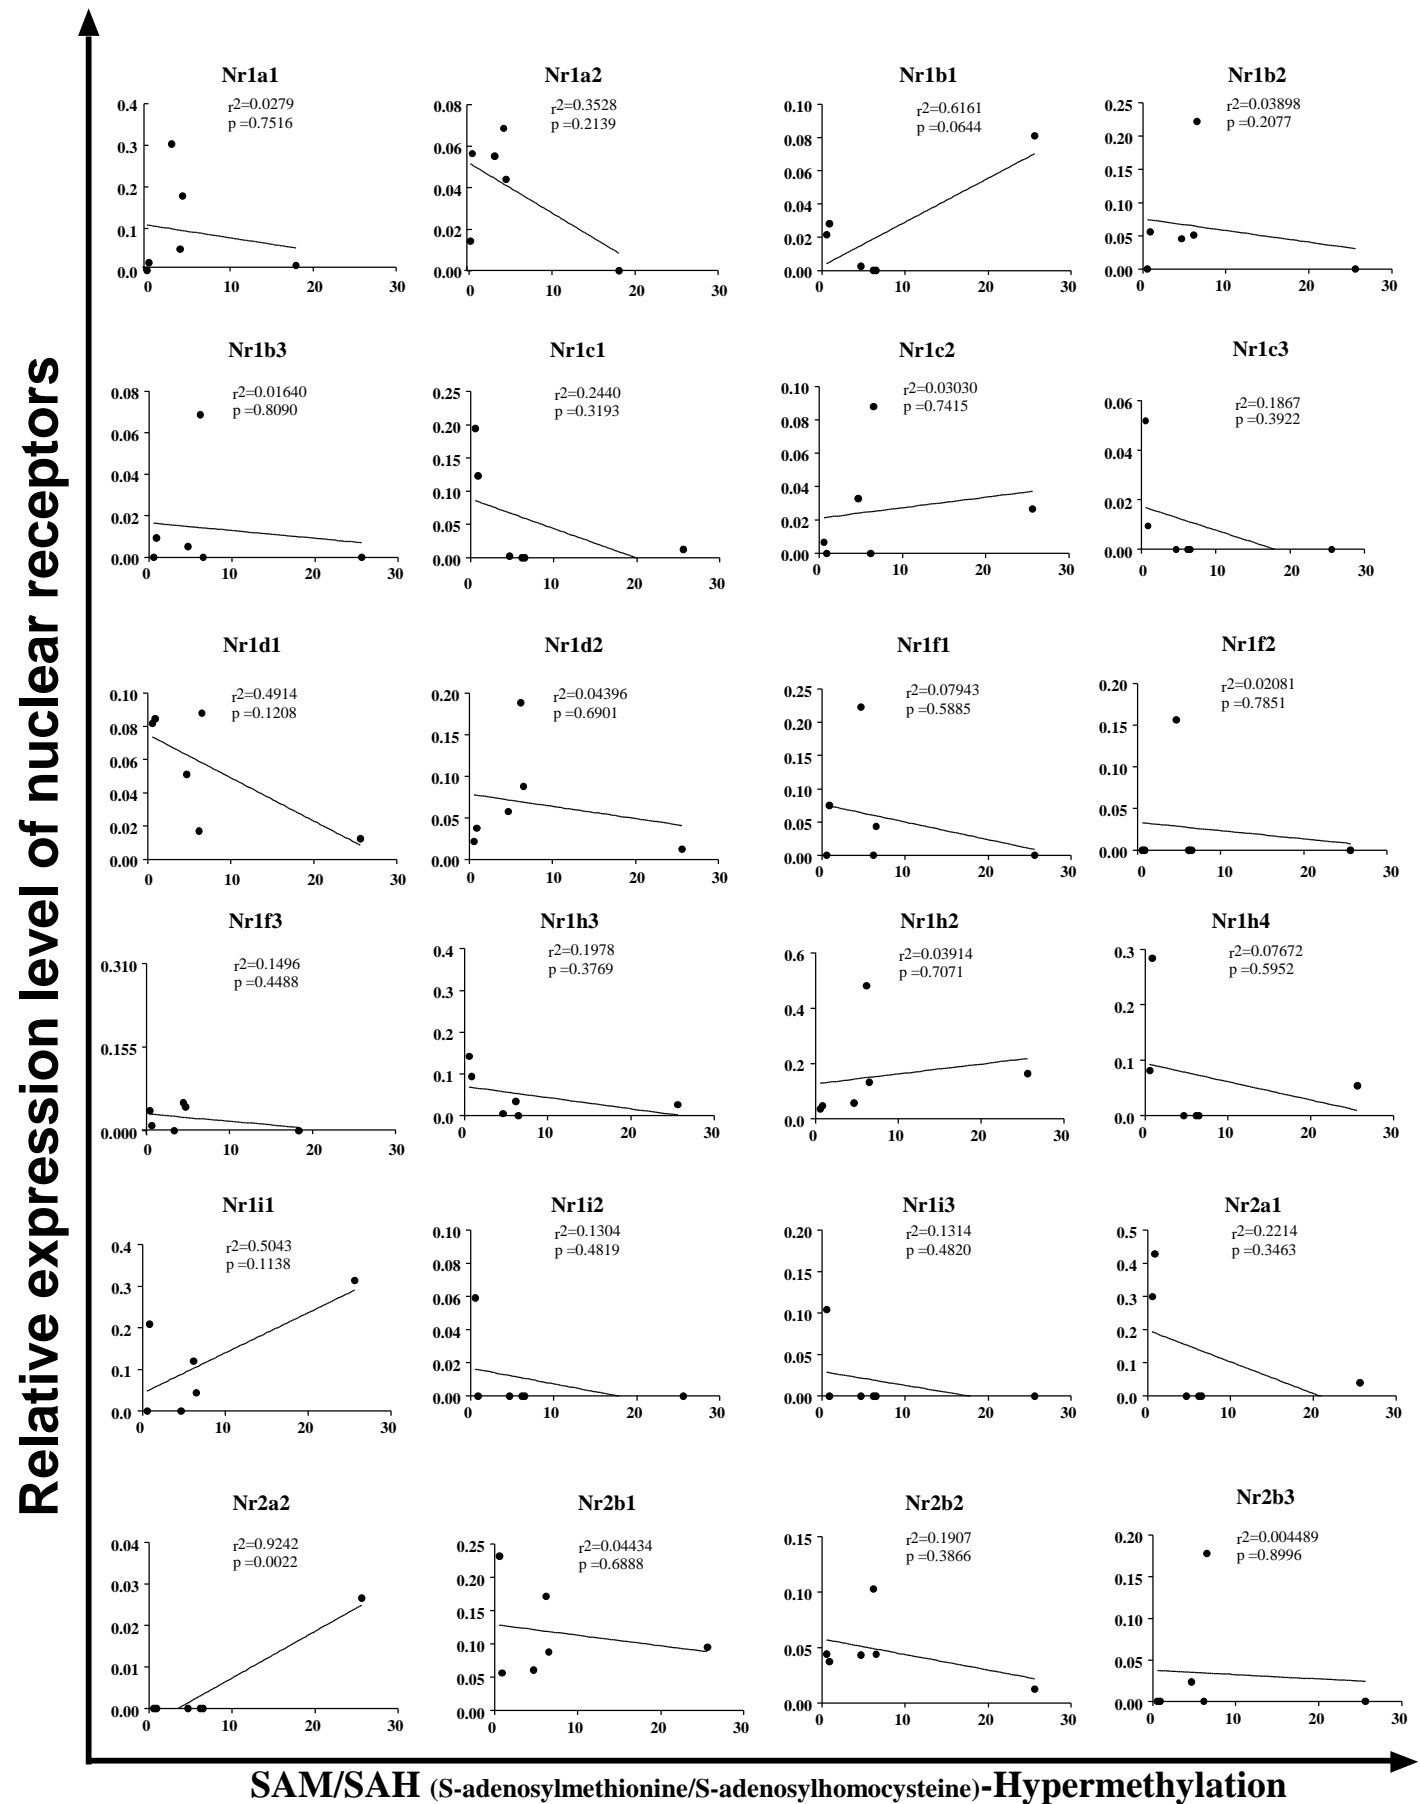

Relative expression level of nuclear receptors

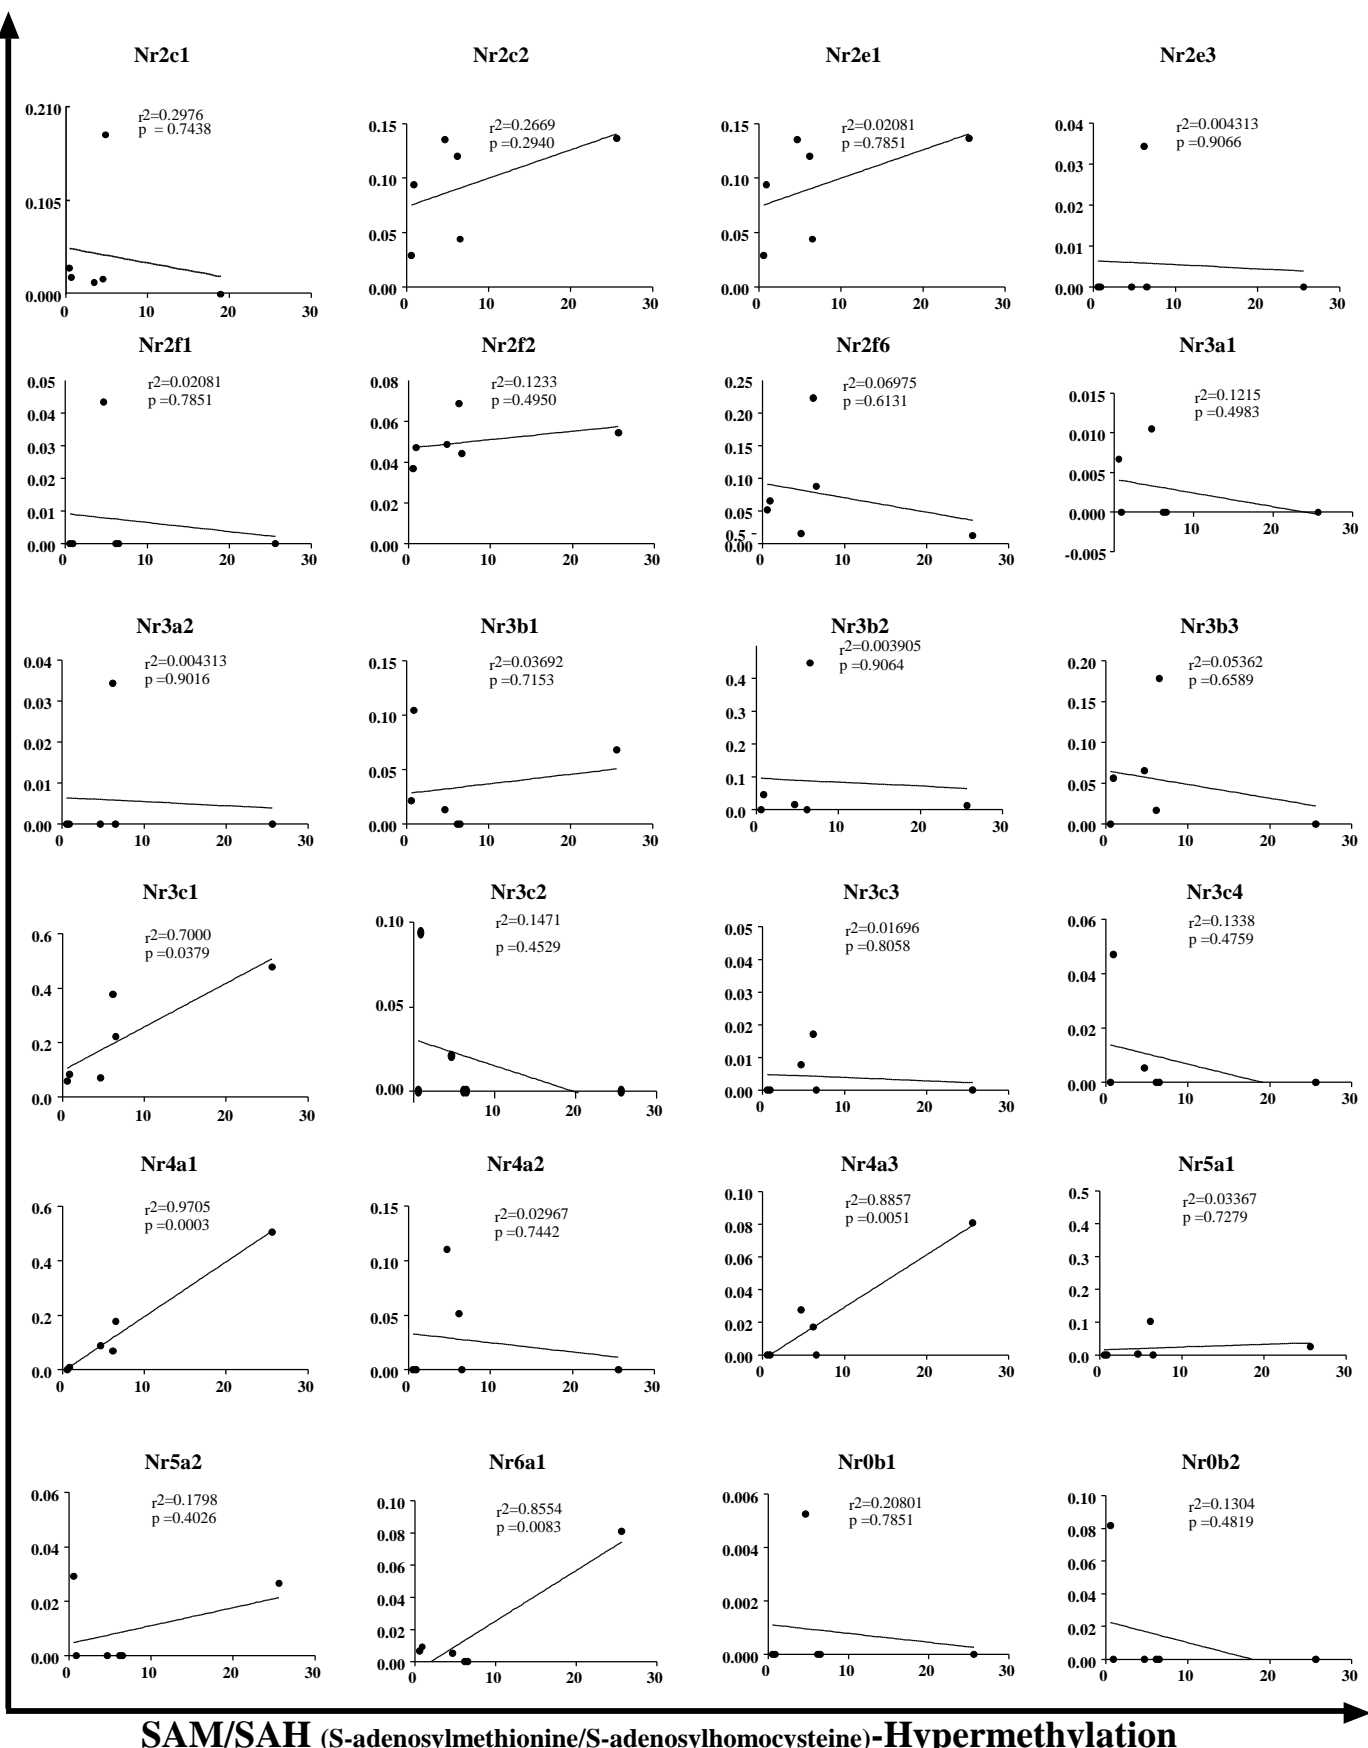

SAM/SAH (S-adenosylmethionine/S-adenosylhomocysteine)-Hypermethylation
